# Supplementary material for: [Retracted] Zonisamide’s Efficacy and Safety on Parkinson’s Disease and Dementia with Lewy Bodies: A Meta‐Analysis and Systematic Review
Source: Hindawi journal article supplement (doi:10.1155/2022/4817488), 2022-01-01
Supplement: f1 [file 4817488.f1.docx]

**Supplementary Material 1：Study Design**

| **1Section and Topic** | **Item #** | **Checklist item** | **Location where item is reported** |
| --- | --- | --- | --- |
| **TITLE** | | |  |
| Title | 1 | Identify the report as a systematic review. | 1 |
| **ABSTRACT** | | |  |
| Abstract | 2 | See the PRISMA 2020 for Abstracts checklist. | 1 |
| **INTRODUCTION** | | |  |
| Rationale | 3 | Describe the rationale for the review in the context of existing knowledge. | 1 |
| Objectives | 4 | Provide an explicit statement of the objective(s) or question(s) the review addresses. | 1 |
| **METHODS** | | |  |
| Eligibility criteria | 5 | Specify the inclusion and exclusion criteria for the review and how studies were grouped for the syntheses. | 2 |
| Information sources | 6 | Specify all databases, registers, websites, organisations, reference lists and other sources searched or consulted to identify studies. Specify the date when each source was last searched or consulted. | 2 |
| Search strategy | 7 | Present the full search strategies for all databases, registers and websites, including any filters and limits used. | 2 |
| Selection process | 8 | Specify the methods used to decide whether a study met the inclusion criteria of the review, including how many reviewers screened each record and each report retrieved, whether they worked independently, and if applicable, details of automation tools used in the process. | 2 |
| Data collection process | 9 | Specify the methods used to collect data from reports, including how many reviewers collected data from each report, whether they worked independently, any processes for obtaining or confirming data from study investigators, and if applicable, details of automation tools used in the process. | 3 |
| Data items | 10a | List and define all outcomes for which data were sought. Specify whether all results that were compatible with each outcome domain in each study were sought (e.g. for all measures, time points, analyses), and if not, the methods used to decide which results to collect. | 3 |
| 10b | List and define all other variables for which data were sought (e.g. participant and intervention characteristics, funding sources). Describe any assumptions made about any missing or unclear information. | 3 |
| Study risk of bias assessment | 11 | Specify the methods used to assess risk of bias in the included studies, including details of the tool(s) used, how many reviewers assessed each study and whether they worked independently, and if applicable, details of automation tools used in the process. | 3 |
| Effect measures | 12 | Specify for each outcome the effect measure(s) (e.g. risk ratio, mean difference) used in the synthesis or presentation of results. | 3 |
| Synthesis methods | 13a | Describe the processes used to decide which studies were eligible for each synthesis (e.g. tabulating the study intervention characteristics and comparing against the planned groups for each synthesis (item #5)). | 3 |
| 13b | Describe any methods required to prepare the data for presentation or synthesis, such as handling of missing summary statistics, or data conversions. | 3 |
| 13c | Describe any methods used to tabulate or visually display results of individual studies and syntheses. | 3 |
| 13d | Describe any methods used to synthesize results and provide a rationale for the choice(s). If meta-analysis was performed, describe the model(s), method(s) to identify the presence and extent of statistical heterogeneity, and software package(s) used. | 3 |
| 13e | Describe any methods used to explore possible causes of heterogeneity among study results (e.g. subgroup analysis, meta-regression). | 3 |
| 13f | Describe any sensitivity analyses conducted to assess robustness of the synthesized results. | 3 |
| Reporting bias assessment | 14 | Describe any methods used to assess risk of bias due to missing results in a synthesis (arising from reporting biases). | 3 |
| Certainty assessment | 15 | Describe any methods used to assess certainty (or confidence) in the body of evidence for an outcome. | 3  3 |
| **RESULTS** | | |  |
| Study selection | 16a | Describe the results of the search and selection process, from the number of records identified in the search to the number of studies included in the review, ideally using a flow diagram. | 3 |
| 16b | Cite studies that might appear to meet the inclusion criteria, but which were excluded, and explain why they were excluded. | 3 |
| Study characteristics | 17 | Cite each included study and present its characteristics. | 3 |
| Risk of bias in studies | 18 | Present assessments of risk of bias for each included study. | 4 |
| Results of individual studies | 19 | For all outcomes, present, for each study: (a) summary statistics for each group (where appropriate) and (b) an effect estimate and its precision (e.g. confidence/credible interval), ideally using structured tables or plots. | 5 |
| Results of syntheses | 20a | For each synthesis, briefly summarise the characteristics and risk of bias among contributing studies. | 5 |
| 20b | Present results of all statistical syntheses conducted. If meta-analysis was done, present for each the summary estimate and its precision (e.g. confidence/credible interval) and measures of statistical heterogeneity. If comparing groups, describe the direction of the effect. | 5 |
| 20c | Present results of all investigations of possible causes of heterogeneity among study results. | 6 |
| 20d | Present results of all sensitivity analyses conducted to assess the robustness of the synthesized results. | 6 |
| Reporting biases | 21 | Present assessments of risk of bias due to missing results (arising from reporting biases) for each synthesis assessed. | 7 |
| Certainty of evidence | 22 | Present assessments of certainty (or confidence) in the body of evidence for each outcome assessed. | 7 |
| **DISCUSSION** | | |  |
| Discussion | 23a | Provide a general interpretation of the results in the context of other evidence. | 7 |
| 23b | Discuss any limitations of the evidence included in the review. | 8 |
| 23c | Discuss any limitations of the review processes used. | 8 |
| 23d | Discuss implications of the results for practice, policy, and future research. | 9 |
| **OTHER INFORMATION** | | |  |
| Registration and protocol | 24a | Provide registration information for the review, including register name and registration number, or state that the review was not registered. | 9 |
| 24b | Indicate where the review protocol can be accessed, or state that a protocol was not prepared. | 9 |
| 24c | Describe and explain any amendments to information provided at registration or in the protocol. | 9 |
| Support | 25 | Describe sources of financial or non-financial support for the review, and the role of the funders or sponsors in the review. | 9 |
| Competing interests | 26 | Declare any competing interests of review authors. | 9 |
| Availability of data, code and other materials | 27 | Report which of the following are publicly available and where they can be found: template data collection forms; data extracted from included studies; data used for all analyses; analytic code; any other materials used in the review. | 9 |

*From:*  Page MJ, McKenzie JE, Bossuyt PM, Boutron I, Hoffmann TC, Mulrow CD, et al. The PRISMA 2020 statement: an updated guideline for reporting systematic reviews. BMJ 2021;372:n71. doi: 10.1136/bmj.n71

For more information, visit: <http://www.prisma-statement.org/>

**Supplementary Material 2:** **Search Measure:**

| **Database** | **Retrieval type** | **The article number** |
| --- | --- | --- |
| pubmed | ((((((Zonisamide[MeSH Terms]) OR (Zonisamide[Title/Abstract])) OR (AD810[Title/Abstract])) OR (CI912[Title/Abstract])) OR (Zonegran[Title/Abstract])) OR (Zonisamide Monosodium[Title/Abstract])) AND (((((((((Parkinson Disease[MeSH Terms]) OR (Dementia with Lewy Bodies [Title/Abstract])) OR (Parkinson Disease[Title/Abstract])) OR (Idiopathic Parkinson's Disease[Title/Abstract])) OR (Lewy Body Parkinson's Disease[Title/Abstract])) OR (Parkinson's Disease[Title/Abstract])) OR (Idiopathic Parkinson Disease[Title/Abstract])) OR (Lewy Body Parkinson Disease[Title/Abstract])) OR (Primary Parkinsonism[Title/Abstract])) OR (Paralysis Agitans[Title/Abstract])) | 112 |
| Cochrane | #1 MeSH descriptor: [Zonisamide] explode all trees #2 (zonisamide):ti,ab,kw OR (ad810):ti,ab,kw OR (ci912):ti,ab,kw OR (zonegran):ti,ab,kw OR (zonisamide monosodium):ti,ab,kw #3 MeSH descriptor: [Parkinson Disease] explode all trees #4 (Dementia with Lewy Bodies):ti,ab,kw OR (parkinson disease):ti,ab,kw OR (parkinson disease):ti,ab,kw OR (idiopathic parkinsons disease):ti,ab,kw OR (lewy body parkinsons disease):ti,ab,kw OR (parkinsons disease):ti,ab,kw #5 (lewy body parkinson disease):ti,ab,kw OR (primary parkinsonism):ti,ab,kw OR (paralysis agitans):ti,ab,kw OR (parkinson disease):ti,ab,kw #6 #3 OR #4 OR #5 #7 #1 OR #2 #8 #6 AND #7 | 60 |
| WOS | #3 #1 AND #2 #2 TS=(Dementia with Lewy Bodies OR Parkinson Disease OR Idiopathic Parkinson's Disease OR Lewy Body Parkinson's Disease OR Parkinson's Disease OR Idiopathic Parkinson Disease OR Lewy Body Parkinson Disease OR Primary Parkinsonism OR Paralysis Agitans) #1 TS=(Zonisamide OR AD810 OR CI912 OR Zonegran OR Zonisamide Monosodium) | 134 |
| EMBASE | #7 #3 AND #6 #6 #4 OR #5 #5 'DLB':ab,ti OR 'parkinson disease':ab,ti OR 'idiopathic parkinsons disease':ab,ti OR 'lewy body parkinsons disease':ab,ti OR 'parkinsons disease':ab,ti OR 'idiopathic parkinson disease':ab,ti OR 'lewy body parkinson disease':ab,ti OR 'primary parkinsonism':ab,ti OR 'paralysis agitans':ab,ti #4 'parkinson disease'/exp #3 #1 OR #2 #2 zonisamide:ab,ti OR ad810:ab,ti OR ci912:ab,ti OR zonegran:ab,ti OR 'zonisamide monosodium':ab,ti #1 'zonisamide'/exp | 367 |

**Supplementary material 3: Basic information for inclusion in the study**

| **Study** | **Year** | **Country** | **Age** | **%Male** | **Number of participants** | **Combined disease** | **Randomised treatments** | **Duration of PD, years** | **Levodopa dose（mg/day）** | **The study period** |
| --- | --- | --- | --- | --- | --- | --- | --- | --- | --- | --- |
| Miho Murata | 2007 | Japan | 65.3 (7.5) | 41 (50.0%) | 82.0 |  | Placebo | 8.9 (5.8) | 351.2 (138.8) | 14 weeks |
|  |  |  | 65.1 (8.5) | 42 (54.5%) | 77.0 |  | Zonisamide 25 mg/day | 8.5 (4.6) | 355.5 (115.6) |  |
|  |  |  | 63.9 (9.4) | 51 (60.0%) | 85 |  | Zonisamide 50 mg/day | 8.6 (6.0) | 363.9 (177.4) |  |
|  |  |  | 65.7 (8.6) | 47 (57.3%) | 82 |  | Zonisamide 100 mg/day | 8.5 (5.6) | 327.7(118.2) |  |
| Miho Murata | 2015 | Japan | 63.6(7.4) | 47(36.4%) | 129 |  | Placebo | 8.7(6.0) |  | 16 weeks |
|  |  |  | 63.4(8.1) | 53(42.4%) | 125 |  | Zonisamide 25 mg/day | 8.4(4.5) |  |  |
|  |  |  | 63.8 (7.8) | 47(38.8%) | 121 |  | Zonisamide 50 mg/day | 8.3(4.9) |  |  |
| Miho Murata | 2015* | Japan | 64.8(6.4) | 38(60.3%) | 63 |  | Placebo | 7.9(5.6) | 334.1 (145.3) | 14 weeks |
|  |  |  | 65.0(6.4) | 31(50.8%) | 61 |  | Zonisamide 25 mg/day | 7.9(4.5) | 351.6 (165.8) |  |
|  |  |  | 64.7(8.5) | 29(47.5%) | 61 |  | Zonisamide 50 mg/day | 6.8(4.3) | 327.9 (119.6) |  |
| M. Murata | 2018 | Japan | 76.3 (6.8) | 31(56.4%) | 55 | Dementia with Lewy bodies (DLB) | Placebo | 3.8(3.3) | 267 (155) | 16weeks |
|  |  |  | 74.3 (5.5) | 30(62.5%) | 48 | Dementia with Lewy bodies (DLB) | Zonisamide 25 mg/day | 3.5(3.0) | 279 (151) |  |
|  |  |  | 74.6 (6.6) | 28(57.1%) | 49 | Dementia with Lewy bodies (DLB) | Zonisamide 50 mg/day | 3.5(2.5) | 292 (142) |  |
| Ken Ikeda | 2018 | Japan | 71.5 (9.9) | 9(60.0%) | 15 |  | Non-ZNS group | 3.5 (1.9) | 290 (114) | 54weeks |
|  |  |  | 73.9 (8.5) | 10(66.7%) | 15 |  | ZNS group | 3.5 (1.2) | 277(155) |  |
| Miho Murata | 2020 | Japan | 76.1 (7.3) | 68(57.6%) | 118 | Dementia with Lewy bodies (DLB) | Placebo | 2.7(2.3) | 252(153) | 52weeks |
|  |  |  | 77.3 (6.8) | 67(57.3%) | 117 | Dementia with Lewy bodies (DLB) | Zonisamide 25 mg/day | 2.8(2.4) | 246(162 ) |  |
|  |  |  | 78.3 (6.1) | 53(47.7%) | 111 | Dementia with Lewy bodies (DLB) | Zonisamide 50 mg/day | 2.8(2.1) | 265(149) |  |
| Miho Murata | 2021 | Japan | 76.0 (7.3) | 64 (60.4%) | 106 | Dementia with Lewy bodies (DLB) | Placebo | 2.7(2.3) | 244 (153) | 52weeks |
|  |  |  | 77.3 (6.8) | 67(57.3%) | 117 | Dementia with Lewy bodies (DLB) | Zonisamide 25 mg/day | 2.8(2.4) | 246 (162) |  |
|  |  |  | 78.3 (6.0) | 54(48.2%) | 112 | Dementia with Lewy bodies (DLB) | Zonisamide 50 mg/day | 2.8(2.1) | 264 (144) |  |

**Supplementary material 4: The data analysis of Adverse reactions:**

**Dyskinesia**

A total of 389 patients (258 zonisamide users and 131 non-users) experienced dyskinesia in one RCT. there was no significant difference in the incidence rate of Dyskinesia between the zonisamide group and the control group (OR-0.91[95%CI:0.47, 1.76], P = 0.77).There was no significant difference in heterogeneity among included studies (P =0.98, I2= 0%).**(Figure 1A)**

**Apathy**

One RCT reported 330 patients (247 zonisamide users and 83 non-users) with APATHY during the trial, and there was no significant difference in the incidence rate of APAthy between the zonisamide group and the control group (OR-1.44[95%CI:0.72, 2.88], P =0.3).There was no significant difference in heterogeneity among included studies (P =0.84, I2= 0%).**(Figure 1B)**

**Cystitis**

A total of one RCTS reported 350 patients (229 zonisamide users and 121 non-users) with adverse events of Cystitis during the trial period, and there was no significant difference in the probability of cystitis occurrence between the zonisamide group and the control group (OR-0.54[95%CI:0.13, 2.21], P = 0.39).There was no significant difference in heterogeneity among included studies (P =0.61, I2= 0%).**(Figure 1C)**

**Hypokalemia**

A total of one RCTS reported adverse hypokalemia in 350 patients (229 zonisamide users and 121 non-users) during the trial, and there was no significant difference in the probability of hypokalemia between the zonisamide group and the control group (OR-0.19[95%CI:0.03, 1.11], P = 0.07).There was no significant difference in heterogeneity among included studies (P =0.68, I2= 0%).**(Figure 1D)**

**Decubitus ulcer**

A total of 350 patients (229 Zonisamide users and 121 non-users) reported adverse reactions in one RCT. The hypokalemia probability was not significantly different between the zonisamide group and the control group (OR-0.25[95%CI:0.04, 95%CI:0.04, 95%CI:0.04). ], P =0.14).There was no significant difference in heterogeneity among included studies (P =0.63, I2= 0%).**(Figure 1E)**

**Dehydration**

A total of 335 RCTS (229 zonisamide users and 106 non-users) reported adverse reactions to dehydration (ERD) during the test period. The occurrence probability of erD was not significantly different between the zonisamide group and the control group (OR-0.51[95%CI:0.17, 1.48]. P = 0.22).There was low heterogeneity among the included studies (P =0.18, I2= 45%).**(Figure 1F)**

**Spinal compression fracture**

One RCTS reported 335 patients (229 zonisamide users and 106 non-users) with spinal fracture during the trial. There was no significant difference in the incidence of spinal fracture between the zonisamide group and the control group (OR-0.46[95%CI:0.17, 1.27], P =0.13).There was no significant difference in heterogeneity among included studies (P =0.47, I2= 0%).**(Figure 2A)**

**Parkinsonism (Aggravation of Existing Symptoms)**

A total of 335 patients (229 zonisamide users and 106 non-users) with Parkinsonism aggravation of existing symptoms were reported in one RCTS during the trial. There was no significant difference in occurrence probability of Parkinsonism aggravation of existing symptoms between the zonisamide group and the control group (OR-0.32[95%CI:0.05, 2.14], P =0.24).There was no significant difference in heterogeneity among included studies (P =0.62, I2= 0%).**(Figure 2B)**

**Loss of consciousness**

A total of 1 RCTS reported that 335 patients (229 zonisamide users and 106 non-users) experienced adverse reactions of loss of consciousness during the trial. There was no significant difference in the occurrence probability of loss of consciousness between the zonisamide group and the control group (OR-0.92[95%CI:0.23, 3.74], P =0.91).There was no significant difference in heterogeneity among included studies (P =0.98, I2= 0%).**(Figure 2C)**

**Restlessness**

A total of two RCTS reported that 685 patients (458 zonisamide users and 227 non-users) experienced adverse effects of restlessness during the trial, and there was no significant difference in the probability of restlessness occurrence between the zonisamide group and the control group (OR-0.48[95%CI:0.11, ], P =0.32).There was no significant difference in heterogeneity among included studies (P =0.44, I2= 0%).**(Figure 2D)**

**Delusion**

A total of one RCTS reported 350 patients (229 zonisamide users and 121 non-users) suffered adverse delusion during the trial, and there was no significant difference in occurrence probability of delusion between the zonisamide group and the control group (OR-0.35[95%CI:0.04, 3.38], P = 0.36).There was no significant difference in heterogeneity among included studies (P =0.99, I2= 0%).**(Figure 2E)**

**Depressed mood**

A total of one RCTS reported that 350 patients (229 Zonisamide users and 121 non-users) experienced depressed mood during the trial, and there was no significant difference in the incidence probability of Depressed mood between the zonisamide group and the control group (OR-0.35[95%CI:0.04, ], P =0.36).There was no significant difference in heterogeneity among included studies (P =0.99, I2= 0%).**(Figure 2F)**

**Dental caries**

A total of 4 RCTS reported the occurrence of adverse dental caries in 843 patients (558 zonisamide users and 285 non-users) during the trial, and there was no significant difference in the occurrence probability of dental caries between the Zonisamide group and the control group (OR-2.09[95%CI:0.60, ], P =0.24).There was low heterogeneity among the included studies (P =0.27, I2= 23%).**(Figure 3A)**

**Fall**

A total of 685 RCTS (458 zonisamide users and 227 non-users) reported adverse events of FALL during the trial period, and there was no significant difference in the incidence of FALL between the zonisamide group and the control group (OR-1.01[95%CI:0.55, 1.85], P =0.97).There was no significant difference in heterogeneity among included studies (P =0.98, I2= 0%).**(Figure 3B)**

**Arthralgia**

A total of one RCTS reported 350 patients (229 zonisamide users and 121 non-users) with adverse effects of Arthralgia during the trial period. There was no significant difference in the incidence rate of Arthralgia between the zonisamide group and the control group (OR-2.07[95%CI:0.36, 12.09], P = 0.42).There was no significant difference in heterogeneity among included studies (P =0.53, I2= 0%).**(Figure 3C)**

**Back pain**

A total of one RCTS reported 350 patients (229 zonisamide users and 121 non-users) with adverse reactions to back pain during the trial, and there was no significant difference in the incidence rate of back pain between the zonisamide group and the control group (OR-1.87[95%CI:0.54, 6.51], P = 0.32).There was no significant difference in heterogeneity among included studies (P =0.79, I2= 0%).**(Figure 3D)**

**Influenza**

A total of one RCTS reported that 335 patients (229 zonisamide users and 106 non-users) had adverse reactions to influenza during the trial. There was no significant difference in the occurrence probability of influenza between the Zonisamide group and the control group (OR-1.71[95%CI:0.62, 4.75], P = 0.3).There was no significant difference in heterogeneity among included studies (P =0.61, I2= 0%).**(Figure 3E)**

**DLB (Aggravation of Existing Symptoms)**

A total of 335 patients (229 zonisamine users and 106 non-users) with existing symptoms developed adverse reactions at DLB during the trial period reported in one RCTS. There was no significant difference in DLB aggravation probability of existing symptoms between the zonisamide group and the control group (OR-1.16[95%CI:0.30, 4.39], P =0.83).There was no significant difference in heterogeneity among included studies (P =0.79, I2= 0%).**(Figure 3F)**

**Psychiatric symptoms**

Two RCTS reported 685 patients (458 zonisamide users and 227 non-users) with adverse psychiatric symptoms during the trial. There was no significant difference in the incidence of psychiatric symptoms between the zonisamide group and the control group (OR-2.32[95%CI:0.69, 7.76], P =0.17).There was no significant difference in heterogeneity among included studies (P =0.86, I2= 0%).**(Figure 4A)**

**Hallucination**

A total of two RCTS reported that 685 patients (458 zonisamide users and 227 non-users) experienced adverse hallucination reactions during the trial, and there was no significant difference in the occurrence rate of hallucination between the Zonisamide group and the control group (OR-1.16[95%CI:0.31, ], p =0.82).There was no significant difference in heterogeneity among included studies (P =0.59, I2= 0%).**(Figure 4B)**

**Visual Hallucination**

A total of one RCTS reported 350 patients (229 Zonisamide users and 121 non-users) experiencing adverse effects of visual hallucination during the trial. There was no significant difference in the occurrence rate of visual hallucination between the zonisamide group and the control group (OR-3.20[95%CI:0.33, 30.97], P =0.32).There was no significant difference in heterogeneity among included studies (P =0.98, I2= 0%).**(Figure 4C)**

**Dizziness**

A total of 665 patients (476 users and 189 non-users) were reported for dark reaction during the trial, and there was no significant difference in the probability of dark reaction between the zonisamide group and the control group (OR-0.84[95%CI:0.43, 1.65], P = 0.61).There was no significant difference in heterogeneity among included studies (P =0.91, I2 = 0%).**(Figure 4D)**

**Nasopharyngitis**

A total of 5 RCTS reported 1421 patients (942 Zonisamide users and 479 non-users) had nasopharyngitis adverse reaction during the trial, There is no significant difference in occurrence probability of nasopharyngitis between zonisamide group and control group (0.38OR-1.17[95%CI:0.83, 1.64], P =0.38).There was low heterogeneity among included studies (P =0.35, I2= 10%).**(Figure 4E)**

**Increased in serum CK**

A total of two RCTS reported 519 patients (373 zonisamide users and 146 non-users) with increased in SERUM CK adverse reactions during the trial. There was no significant difference in the incidence rate of increased in SERUM CK between the zonisamide group and the control group (0.77OR-0.77[95%CI:0.43, 1.38], P =0.38).There was no significant difference in heterogeneity among included studies (P =0.76, I2= 0%).**(Figure 4F)**

**Bronchitis**

A total of two RCTS reported 724 patients (487 Zonisamide users and 237 non-users) having poor auditing during the study, with no significant difference in the incidence of AUDITING between the Zonisamide group and the control group (0.76OR-0.76[95%CI:0.36, ], P =0.46).There was no significant difference in heterogeneity among included studies (P =0.59, I2= 0%).**(Figure 5A)**

**Blood lactate dehydrogenase increased**

A total of 389 RCTS (258 Zonisamide users and 131 non-users) reported blood lactate dehydrogenase increased adverse reactions during the trial. There was no significant difference in the occurrence probability of blood lactate dehydrogenase increased between the zonisamide group and the control group (OR-0.89[95%CI:0.32, 2.49], P =0.82).There was no significant difference in heterogeneity among included studies (P =0.77, I2= 0). **(Figure 5B)**

**Blood urea increased**

A total of 389 patients (258 Zonisamide users and 131 non-users) with an adverse reaction to blood urea increased during the trial were reported in 1 RCTS. There was no significant difference in the incidence rate of blood urea increased between the Zonisamide group and the control group (OR-1.28[95%CI:0.32, 5.19], P =0.73).There was no significant difference in heterogeneity among included studies (P =0.36, I2= 0%).**(Figure 5C)**

| **A** 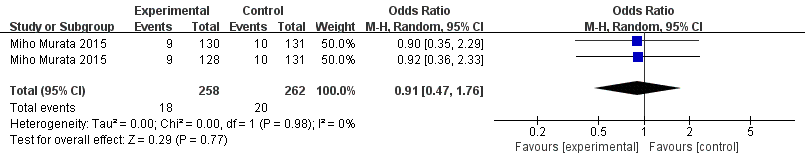 |
| --- |
| B 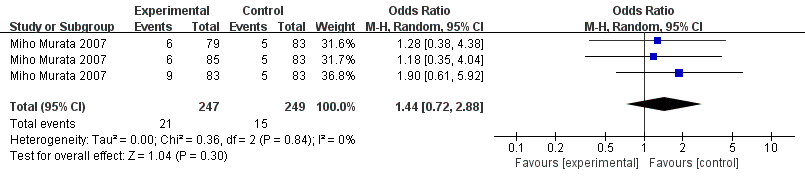 |
| **C** 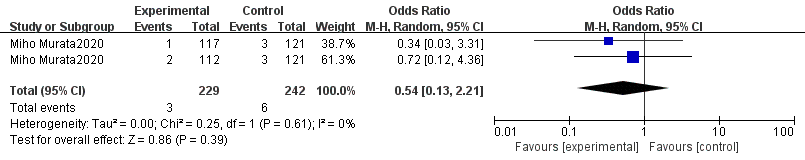 |
| **D** 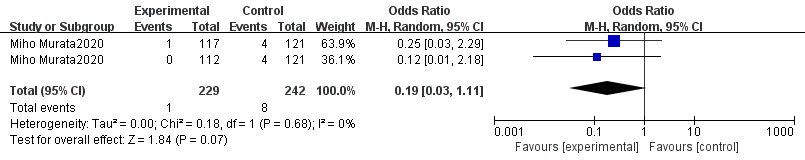 |
| **E** 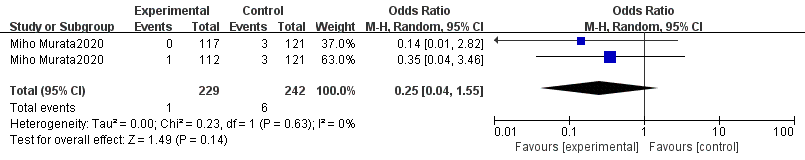 |
| **F** 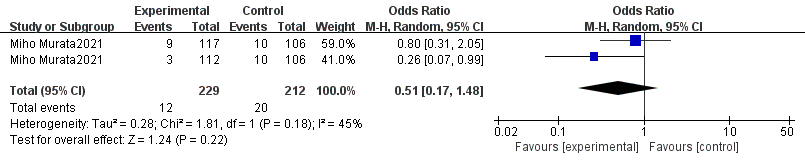 |

**FIGURE 1**| Dyskinesia (A)；Apathy (B)；Cystitis (C)；Hypokalemia (D)；Decubitus ulcer (E)；Dehydration (F).

| **A** 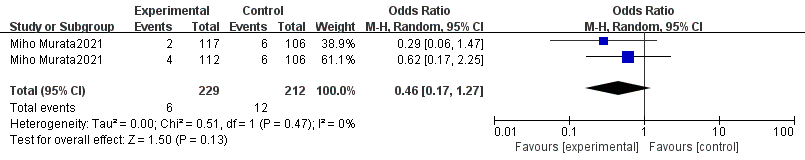 |
| --- |
| **B** 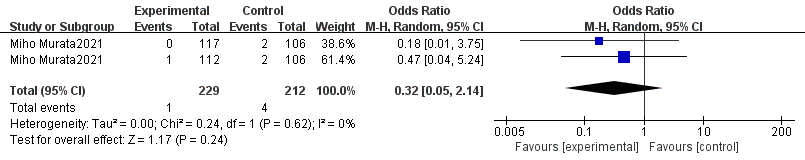 |
| **C** 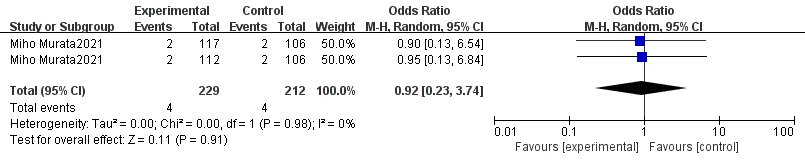 |
| **D** 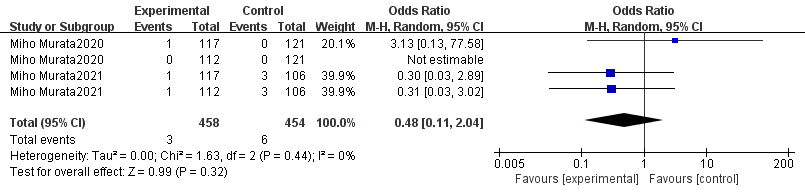 |
| **E** 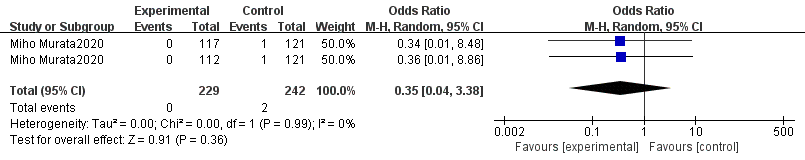 |
| **F** 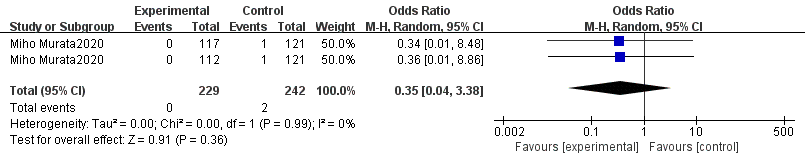 |

**FIGURE 2**| Spinal compression fracture (A)； Parkinsonism (B)；Loss of consciousness (C)；Restlessness (D)；Delusion (E) ;Depressed mood (F).

| **A** 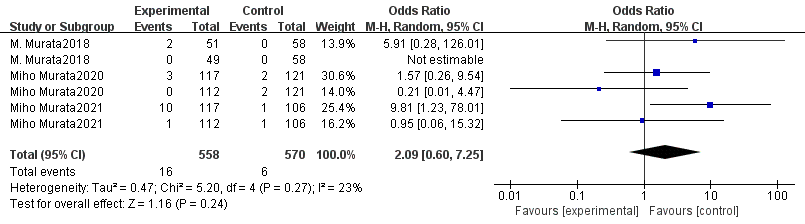 |
| --- |
| **B** 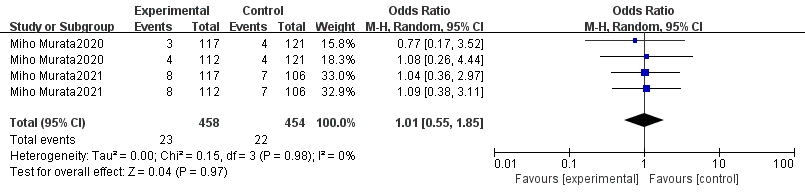 |
| **C** 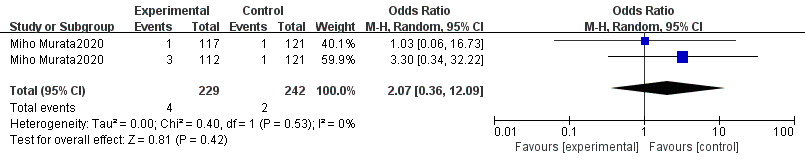 |
| **D** 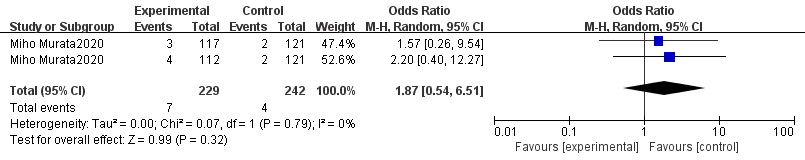 |
| **E** 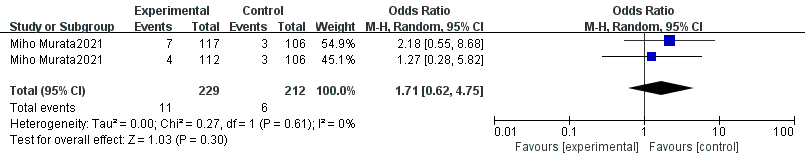 |
| **F** 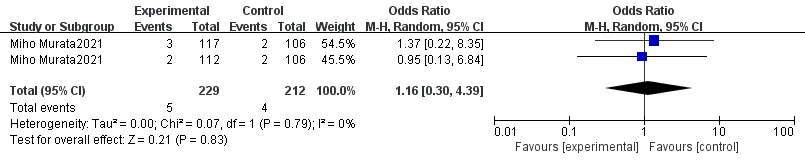 |

**FIGURE 3**| Dental caries(A); Fall (B)；Arthralgia (C)；Back pain (D)；Influenza (E);DLB (F).

| **A** 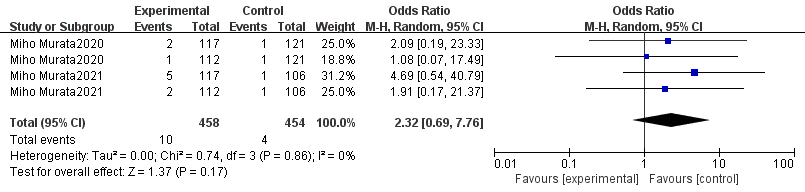 |
| --- |
| **B** 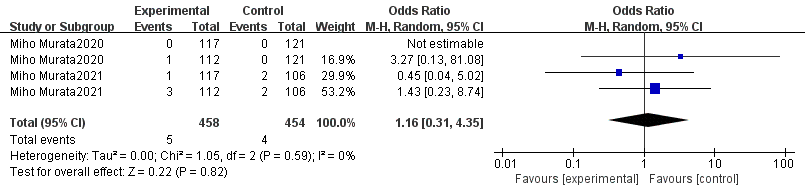 |
| **C** 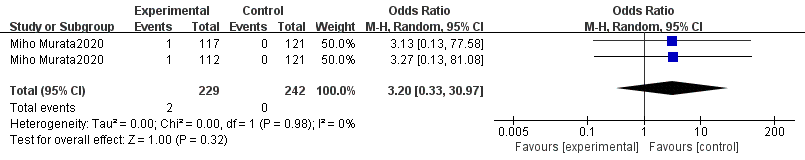 |
| **D** 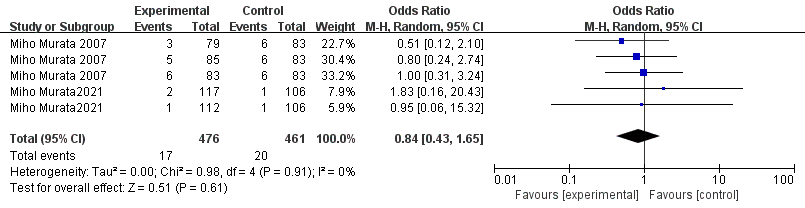 |
| **E** 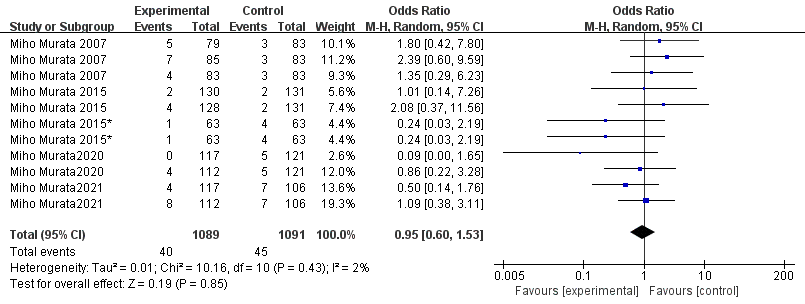 |
| **F** 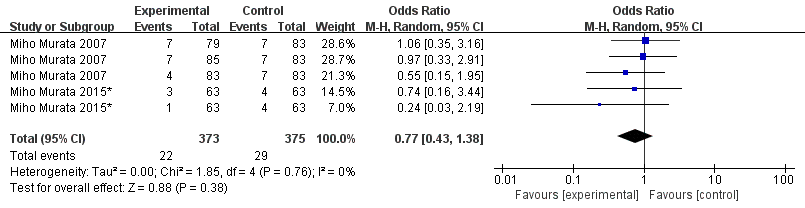 |

**FIGURE 4**| Psychiatric symptoms (A)；Hallucination (B)；Visual Hallucination (C) ;Dizziness (D)；Nasopharyngitis (E)；Increased in serum CK (F).

| **A** 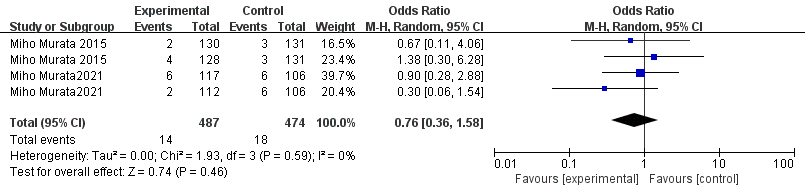 |
| --- |
| **B** 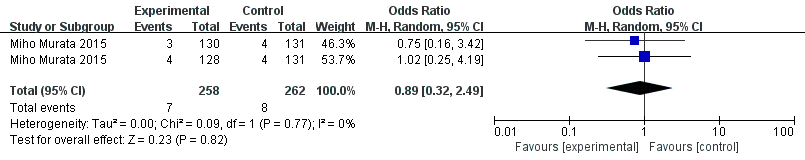 |
| **C** 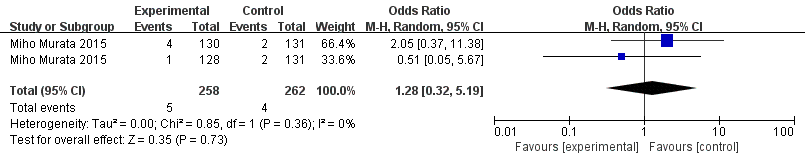 |

**FIGURE 5**|Bronchitis (A)；Blood lactate dehydrogenase increased (B). Blood urea increased (C).
